# Supplementary material for: Development of a core competency framework for clinical informatics
Source: PubMed Central journal article supplement — BMJ Health Care Inform. 2021 Jul 15;28(1):e100356. doi: 10.1136/bmjhci-2021-100356 (PMC8286765; doi:10.1136/bmjhci-2021-100356), 2021-07-15
Supplement: bmjhci-2021-100356supp001.pdf [file bmjhci-2021-100356supp001.pdf]

## Appendix

1. Can you tell us a bit about your role and background in CI?
2. How well do you think that these competencies reflect those required by CI in the UK?
  - a. Are there any that you think are not required in the UK/irrelevant to the UK?
3. Are there any competencies that you would expect to see here that are missing?
  - a. If so which one(s)?
4. Of the competencies presented, which of them do you think represent 'core' competencies that would be fundamental to CIs?
5. Are there any competences in the framework that you believe are outside the scope of the CI role?
  - a. If so which one(s)?
6. Are there any changes to terminology that you would suggest to the competency framework?
  - a. If so what?
  - b. Why?
7. Where do you think the boundaries of the profession are currently positioned?
  - a. How/where would you propose/define boundaries?
  - b. Do you think this will change in the future, if so how?
8. Are there any competencies that you would define or scope differently?
  - a. Which ones?
  - b. How would you redefine/scope them?
9. Is there anything else you would like to mention?
10. What professions do you think should be included in this framework?
11. Do you have any comments on the structure and groupings of the framework competencies?
  - a. If so, what are they?
12. Which domain do you personally spend most time in?
13. What would the output of this framework look like for you?

**Box 2:** Interview schedule for semi-structured interviews

### Demographic and diversity questions:

- Q1. What is your professional role?
- Q2. Years of experience working in informatics?
- Q3. Main informatics background (check one):
- Clinical Informatics
  - Social (care) Informatics
  - Nursing Informatics
  - Pharmacy Informatics
  - Public Health Informatics
  - Other (please state)
- Q4. How would you rate your informatics expertise?
- Q5. How do you describe yourself? (check one):
- Male
  - Female
  - Prefer not to say
  - Other (please state)
- Q6. What year were you born in? (optional)

### Primary survey:

- Q1. How well do you think these competencies represent those required by professionals to work in

the field of Clinical Informatics in the UK?

Q2. These competencies represent core competencies

Q3. The framework strikes the right balance between clinical and technical areas of Clinical Informatics.

Q4. How easy to understand do you think the competencies in the framework are?

Q5. How well do you think the competencies in the framework are presented?

Q6. How many of these competencies do you currently cover?

Q7. If there are any competencies that you think are missing from the framework, please briefly describe them

Q8. If there are any competencies in the framework you think are not 'core' competencies, please indicate which ones by their number(s) followed by a brief reason

Q9. Would you suggest any changes to the terminology used in the framework? If so, please briefly describe

Q10. Do you have any comments on the overall structure or grouping of the framework competencies?

Q11. Do you have any comments about any individual competencies in the framework? If so please state the number of the competency and then make your comment

Q12. Is there anything else that you would like to mention?

**Box 3:** Survey questions
